# Supplementary material for: Boosting efficiency above 28% using effective charge transport layer with Sr 3 SbI 3 based novel inorganic perovskite
Source: Royal Society of Chemistry journal article supplement (doi:10.1039/d3ra06137j), 2023-01-01
Supplement: d3ra06137j1.pdf [file d3ra06137j1.pdf]

## **Boosting efficiency above 28% using effective charge transport layer with Sr<sub>3</sub>SbI<sub>3</sub> based novel inorganic perovskite**

Md. Shamim Reza<sup>1</sup>, Md. Ferdous Rahman<sup>1\*</sup>, Abdul Kuddus<sup>2\*\*</sup>, Mustafa K. A. Mohammed<sup>3</sup>, Ali K. Al-Mousoi<sup>4</sup>, Md. Rasidul Islam<sup>5</sup>, Avijit Ghosh<sup>1</sup>, Sagar Bhattarai<sup>6</sup>, Rahul Pandey<sup>7</sup>, Jaya Madan<sup>7</sup>, M. Khalid Hossain<sup>8</sup>

<sup>1</sup>*Advanced Energy Materials and Solar Cell Research Laboratory, Department of Electrical and Electronic Engineering, Begum Rokeya University, Rangpur 5400, Bangladesh*

<sup>2</sup>*Ritsumeikan Global Innovation Research Organization, Ritsumeikan University, Shiga 525-8577, Japan*

<sup>3</sup>*College of Engineering, University of Warith Al-Anbiyaa, Karbala 56001, Iraq*

<sup>4</sup>*Electrical Engineering Department, College of Engineering, Al-Iraqia University, Baghdad 10011, Iraq*

<sup>5</sup>*Department of Electrical and Electronic Engineering, Bangamata Sheikh Fojilatunnesa Mujib Science & Technology University, Jamalpur-2012, Bangladesh*

<sup>6</sup>*Department of Physics, Arunachal University of Studies, Namsai, 792103, Arunachal Pradesh, India*

<sup>7</sup>*VLSI Centre of Excellence, Chitkara University Institute of Engineering and Technology, Chitkara University, Rajpura 140401 Punjab, India*

<sup>8</sup>*Institute of Electronics, Atomic Energy Research Establishment, Bangladesh Atomic Energy Commission, Dhaka 1349, Bangladesh*

---

Correspondence: \*ferdousapee@gmail.com (Md. Ferdous Rahman); ORCID: 0000-0002- 0090-2384

\*\*kuddus4910@gmail.com (Abdul Kuddus); ORCID: 0000-0001-5204-3844

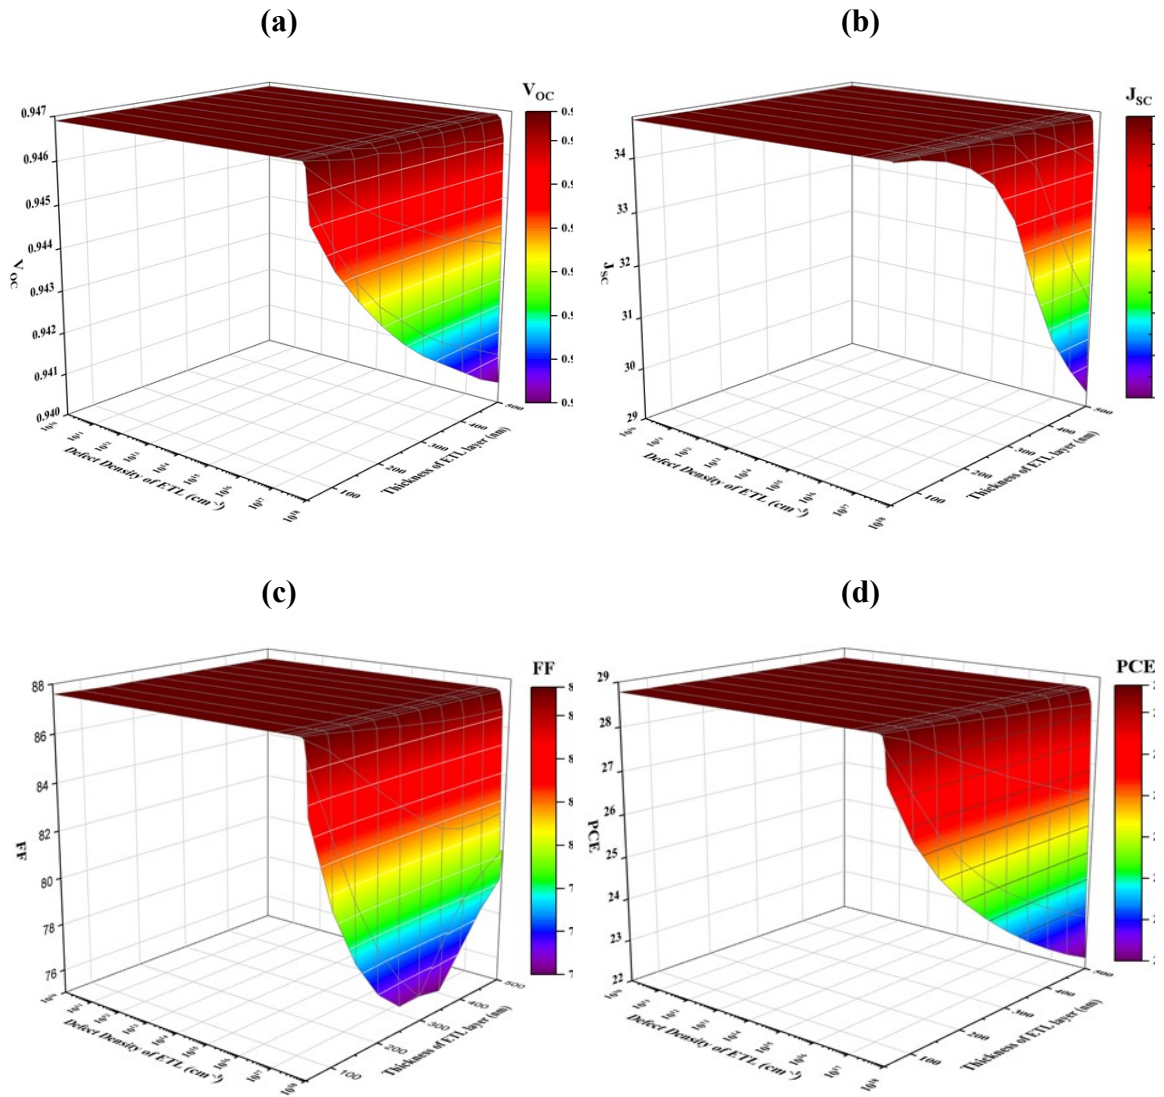

**Figure S1.** Effects of SnS<sub>2</sub> ETL thickness and bulk defect density variations on photovoltaic parameters; (a)  $V_{oc}$  (b)  $J_{sc}$  (c) FF and (d) PCE.

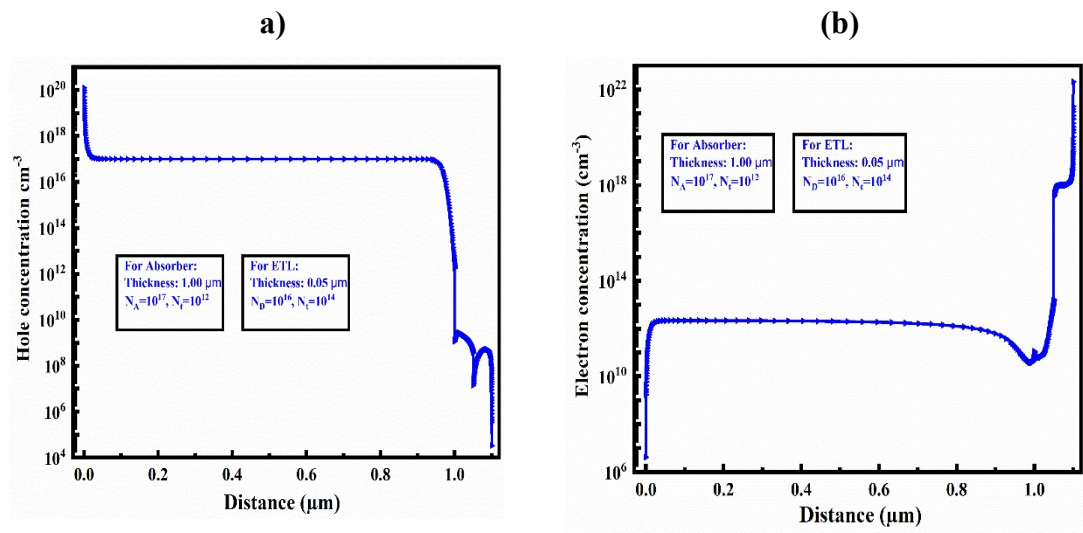

**Figure S2.** Influence of (a) hole and (b) electron carrier concentration.
